# Supplementary material
Source: PubMed Central journal article supplement (PMC2690021)
Supplement: 0901329106_ST2_PDF.pdf [file 0901329106_ST2_PDF.pdf]

**Table S2. P-values from two-sided Mann Whitney tests to compare IFN-induced fold changes in pSTAT1 between breast cancer patients with different disease stages and between breast cancer patients who had not received therapy versus those who had received neoadjuvant or adjuvant chemotherapy.**

| Samples compared                    |                                            | Cell Types | p-values      |               |
|-------------------------------------|--------------------------------------------|------------|---------------|---------------|
|                                     |                                            |            | IFN- $\alpha$ | IFN- $\gamma$ |
| BC stage II<br>n=10                 | BC stage III<br>n=9                        | T          | 0.3562        | 0.9048        |
|                                     |                                            | B          | 0.1823        | 0.3562        |
|                                     |                                            | NK         | 0.3562        | 0.9654        |
| BC stage II<br>n=10                 | BC stage IV<br>n=8                         | T          | 0.8266        | 1.0000        |
|                                     |                                            | B          | 0.8266        | 0.6334        |
|                                     |                                            | NK         | 0.0831        | 0.3154        |
| BC stage III<br>n=9                 | BC stage IV<br>n=8                         | T          | 0.7430        | 0.9626        |
|                                     |                                            | B          | 0.4807        | 0.8148        |
|                                     |                                            | NK         | 0.5414        | 0.3823        |
| BC stage III<br>No therapy<br>n=5   | BC stage III<br>Neoadjuvant therapy<br>n=4 | T          | 0.6430        | 0.1367        |
|                                     |                                            | B          | 0.9805        | 0.5747        |
|                                     |                                            | NK         | 0.4208        | 0.3667        |
| BC all stages<br>No therapy<br>n=15 | BC all stages<br>Chemotherapy<br>n=12      | T          | 0.1367        | 0.6430        |
|                                     |                                            | B          | 0.5747        | 0.9805        |
|                                     |                                            | NK         | 0.3667        | 0.4208        |
