# Supplementary material
Source: PubMed Central journal article supplement (PMC2690021)
Supplement: 0901329106_ST3_PDF.pdf [file 0901329106_ST3_PDF.pdf]

**Table S3. Statistical analysis of expression of activation markers and apoptosis in T cells stimulated with anti-CD3/CD28 antibodies (aCD3/CD28) alone or in combination with IFN- $\alpha$  or IFN- $\gamma$  in breast cancer patients versus healthy controls.**

**A. P-values and estimated differences with 95% CI from two-sided Mann Whitney test to compare single marker data from breast cancer patients and healthy controls.**

| Marker  | p-values and estimated differences with 95% CI under each stimulation condition |               |                          |                |                          |                  | Sample Size |    |
|---------|---------------------------------------------------------------------------------|---------------|--------------------------|----------------|--------------------------|------------------|-------------|----|
|         | aCD3/CD28                                                                       |               | aCD3/CD28 +IFN- $\alpha$ |                | aCD3/CD28 +IFN- $\gamma$ |                  | H           | BC |
| CD25    | 0.004                                                                           | 10 (2 to 42)  | 0.020                    | 20.5 (3 to 36) | 0.185                    | 13.5 (-4 to 33)  | 8           | 8  |
| HLA-DR  | 0.018                                                                           | 6.5 (1 to 16) | 0.109                    | 8 (-1 to 20)   | 0.486                    | 3 (-11 to 16)    | 8           | 8  |
| CD54    | 0.108                                                                           | 17 (-1 to 42) | 0.016                    | 28.5 (6 to 46) | 0.137                    | 14 (-6 to 38)    | 8           | 8  |
| CD95    | 0.848                                                                           | 0 (-2 to 3)   | 0.077                    | 10 (-1 to 22)  | 0.061                    | 11 (-2 to 21)    | 8           | 8  |
| Anx Viv | 0.087                                                                           | -6 (-17 to 0) | 0.818                    | -2 (-20 to 23) | 0.363                    | -4.5 (-23 to 16) | 8           | 8  |

**B. Correlation of activation markers in T cells stimulated with anti-CD3 anti-CD28 antibodies alone or in combination with IFN- $\alpha$  or IFN- $\gamma$ .**

| Pairs of Markers | Correlation coefficient under each stimulation condition |                          |                          |
|------------------|----------------------------------------------------------|--------------------------|--------------------------|
|                  | aCD3/CD28                                                | aCD3/CD28 +IFN- $\alpha$ | aCD3/CD28 +IFN- $\gamma$ |
| CD25 & CD54      | 0.94                                                     | 0.92                     | 0.92                     |
| CD25 & CD95      | 0.19                                                     | 0.74                     | 0.81                     |
| CD25 & HLA-DR    | 0.90                                                     | 0.65                     | 0.64                     |
| CD54 & CD95      | 0.35                                                     | 0.75                     | 0.86                     |
| CD54 & HLA-DR    | 0.87                                                     | 0.60                     | 0.51                     |
| CD95 & HLA-DR    | 0.13                                                     | 0.59                     | 0.56                     |

**C. P-values from multivariate analysis of CD25, CD54, HLA-DR and CD95 expression in T cells from breast cancer patients versus healthy controls using principal components analysis followed by two-sided Mann-Whitney test along the first principal component.**

| p-values under each stimulation condition |                          |                          | Sample Size |    |
|-------------------------------------------|--------------------------|--------------------------|-------------|----|
| aCD3/CD28                                 | aCD3/CD28 +IFN- $\alpha$ | aCD3/CD28 +IFN- $\gamma$ | H           | BC |
| 0.021                                     | 0.038                    | 0.083                    | 8           | 8  |
