# Supplementary material
Source: PubMed Central journal article supplement (PMC2690021)
Supplement: 0901329106_ST4_PDF.pdf [file 0901329106_ST4_PDF.pdf]

**Table S4. Breast Cancer Patient Demographics and Clinical Data.**

| Table S2. Breast Cancer Patient Demographics and Clinical Data. |       |        |           |         |         |          |          |          |
|-----------------------------------------------------------------|-------|--------|-----------|---------|---------|----------|----------|----------|
| ID                                                              | B4-1  | Gender | Stage     | Surgery | Therapy | ER       | PR       | HER2/Neu |
| B4-1                                                            | B4-2  | Female | IV        | Post    | Ongoing | Unk      | Unk      | Unk      |
| B4-2                                                            | B4-3  | Female | IV        | Post    | Ongoing | Pos      | Pos      | Neg      |
| B4-3                                                            | B4-4  | Female | IV        | Pre     | Unknown | Unk      | Unk      | Unk      |
| B4-4                                                            | B4-5  | Female | IV        | Pre     | Post    | Pos/Pos* | Pos/Pos* | Neg/Pos* |
| B4-5                                                            | B4-6  | Female | IV        | Post    | Ongoing | Pos      | Pos      | Pos      |
| B4-6                                                            | B4-7  | Female | IV        | Post    | Ongoing | Pos      | Pos      | Pos      |
| B4-7                                                            | B4-8  | Female | IV        | Post    | Pre     | Pos      | Pos      | Neg      |
| B4-8                                                            | B4-9  | Female | IV        | Post    | Ongoing | Pos      | Pos      | Neg      |
| B4-9                                                            | B4-10 | Female | IV        | Pre     | Pre     | Neg      | Neg      | Pos      |
| B4-10                                                           | B4-11 | Female | IV        | Post    | Pre     | Pos      | Neg      | Neg      |
| B4-11                                                           | B3-1  | Female | IV        | Pre     | Pre     | Pos      | Pos      | Neg      |
| B3-1                                                            | B3-2  | Female | IIIc      | Pre     | Pre     | Pos      | Pos      | Neg      |
| B3-2                                                            | B3-3  | Female | IIIa      | Pre     | Pre     | Neg      | Neg      | Neg      |
| B3-3                                                            | B3-4  | Female | IIIa      | Pre     | Pre     | Pos      | Pos      | Neg      |
| B3-4                                                            | B3-5  | Female | IIIc      | Pre     | Post    | Pos      | Neg      | Neg      |
| B3-5                                                            | B3-6  | Female | IIIc      | Pre     | Post    | Pos      | Pos      | Pos      |
| B3-6                                                            | B3-7  | Female | IIIb/IIIc | Pre     | Post    | Pos      | Pos      | Pos      |
| B3-7                                                            | B3-8  | Female | IIIc      | Pre     | Pre     | Pos      | Pos      | Neg      |
| B3-8                                                            | B3-9  | Female | IIIc      | Post    | Pre     | Neg      | Neg      | Neg      |
| B3-9                                                            | B3-10 | Female | IIIc      | Pre     | Post    | Pos      | Pos      | Pos      |
| B3-10                                                           | B2-1  | Female | IIIa      | Pre     | Pre     | Neg      | Neg      | Neg      |
| B2-1                                                            | B2-2  | Female | IIa       | Pre     | Pre     | Neg      | Pos      | Neg      |
| B2-2                                                            | B2-3  | Female | IIa       | Pre     | Post    | Pos      | Pos      | Neg      |
| B2-3                                                            | B2-4  | Female | IIa       | Pre     | Pre     | Neg      | Neg      | Neg      |
| B2-4                                                            | B2-5  | Female | IIa       | Pre     | Pre     | Pos      | Pos      | Neg      |
| B2-5                                                            | B2-6  | Female | IIb       | Pre     | Pre     | Neg      | Neg      | Neg      |
| B2-6                                                            | B2-7  | Female | IIb       | Pre     | Pre     | Pos      | Neg      | Neg      |
| B2-7                                                            | B2-8  | Female | IIa       | Pre     | Pre     | Pos      | Pos      | Neg      |
| B2-8                                                            | B2-9  | Female | IIa       | Pre     | Pre     | Pos      | Pos      | Neg      |
| B2-9                                                            | B2-10 | Female | IIa       | Pre     | Pre     | Pos      | Pos      | Neg      |
| B2-10                                                           | B2-11 | Female | IIa       | Pre     | Pre     | Pos/Pos* | Pos/Neg* | Neg/Neg* |
| B2-11                                                           | B2-12 | Female | IIb       | Pre     | Pre     | Pos      | Pos      | Neg      |
| B2-12                                                           | B2-13 | Female | IIb       | Pre     | Pre     | Neg      | Neg      | Neg      |
| B2-13                                                           | 65    | Female | IIa       | Pre     | Pre     | Pos      | Pos      | Neg      |

\*Bilateral Breast cancer. Right side listed first. Unk - Unknown
