# Supplementary material
Source: PubMed Central journal article supplement (PMC2690021)
Supplement: 0901329106_ST5_PDF.pdf [file 0901329106_ST5_PDF.pdf]

**Table S5. Melanoma Patient Demographics and Clinical Data.**

| <b>Table S3. Melanoma Patient Demographics and Clinical Data.</b> |            |               |              |                |                |
|-------------------------------------------------------------------|------------|---------------|--------------|----------------|----------------|
| <b>ID</b>                                                         | <b>Age</b> | <b>Gender</b> | <b>Stage</b> | <b>Surgery</b> | <b>Therapy</b> |
| M1                                                                | 48         | Female        | IIIb         | Pre            | Pre            |
| M2                                                                | 74         | Male          | IV           | Pre            | Pre            |
| M3                                                                | 40         | Male          | III          | Pre            | Pre            |
| M4                                                                | 47         | Female        | IIIa         | Pre            | Pre            |
| M5                                                                | 25         | Female        | IIIc         | Pre            | Pre            |
| M6                                                                | 58         | Female        | IIIc         | Post           | Pre            |
| M7                                                                | 34         | Male          | III          | Pre            | Post           |
| M8                                                                | 59         | Male          | IIIb         | Pre            | Pre            |
| M9                                                                | 51         | Male          | IIIc         | Post           | Post           |
| M10                                                               | 78         | Male          | IIIc         | Pre            | Pre            |
| M11                                                               | 41         | Male          | IIIb         | Pre            | Pre            |
| M12                                                               | 46         | Male          | IIb          | Pre            | Pre            |
| M13                                                               | 76         | Female        | IIIC         | Pre            | Pre            |
