# Supplementary material
Source: PubMed Central journal article supplement (PMC2690021)
Supplement: 0901329106_ST7_PDF.pdf [file 0901329106_ST7_PDF.pdf]

**Table S7. Healthy Control Demographics.**

| <b>Table S5. Healthy Control Demographics</b> |            |               |                       |
|-----------------------------------------------|------------|---------------|-----------------------|
| <b>ID</b>                                     | <b>Age</b> | <b>Gender</b> | <b>Disease Status</b> |
| H1                                            | 61         | Female        | Healthy               |
| H2                                            | 60         | Female        | Healthy               |
| H3                                            | 43         | Male          | Healthy               |
| H4                                            | 56         | Male          | Healthy               |
| H5                                            | 44         | Female        | Healthy               |
| H6                                            | 60         | Male          | Healthy               |
| H7                                            | 54         | Female        | Healthy               |
| H8                                            | 36         | Male          | Healthy               |
| H9                                            | 56         | Female        | Healthy               |
| H10                                           | 34         | Female        | Healthy               |
| H11                                           | 33         | Female        | Healthy               |
| H12                                           | 51         | Female        | Healthy               |
| H13                                           | 70         | Female        | Healthy               |
| H14                                           | 42         | Female        | Healthy               |
| H15                                           | 44         | Female        | Healthy               |
| H16                                           | 53         | Female        | Healthy               |
| H17                                           | 50         | Male          | Healthy               |
| H18                                           | 70         | Male          | Healthy               |
| H19                                           | 43         | Male          | Healthy               |
| H20                                           | 78         | Female        | Healthy               |
| H21                                           | 77         | Male          | Healthy               |
| H22                                           | 43         | Male          | Healthy               |
| H23                                           | 46         | Female        | Healthy               |
| H24                                           | 57         | Female        | Healthy               |
| H25                                           | 58         | Male          | Healthy               |
| H26                                           | 69         | Male          | Healthy               |
| H27                                           | 68         | Male          | Healthy               |
| H28                                           | 55         | Male          | Healthy               |
| H29                                           | 52         | Female        | Healthy               |
| H30                                           | 51         | Male          | Healthy               |
| H31                                           | 42         | Male          | Healthy               |
| H32                                           | 51         | Female        | Healthy               |
| H33                                           | 51         | Male          | Healthy               |
